# Supplementary material for: Personalized analysis of breast cancer using sample-specific networks
Source: PeerJ. 2020 May 15;8:e9161. doi: 10.7717/peerj.9161 (PMC7233277; doi:10.7717/peerj.9161)
Supplement: Supplemental Information 6 — Table S7: Key genes shared by four subtypes. Table S8: Subtype-specific key genes. Table S9: Enriched pathways shared by four subtypes. Table S10: Subtype-specific enriched pathways. [file peerj-08-9161-s006.xlsx]

## Sheet: Table S7
Table S7: Key genes shared by 4 subtypes( the intersection of key genes in LumA,LumB,Her2 and Basal-like)
RPS17
PSMA2
PRPF19
ERCC5
DHX38
NDUFA8
PSMA6
HIST1H4I
RPL17
NDUFB8
CCNB1
ANAPC4
ERCC3
FEN1
PPIH
RPL36A
RBM8A
RPL26L1
PSMB5
RPL14
PSMA5
RPL21
PSMC1
HIST1H2AM
SNRPB
NDUFA7
ANAPC5
UBE2C
SF3B4
SRSF10
PARP1
DDX39B
GTF2H4
GRB2

## Sheet: Table S8
Table S8: Subtype-specific key genes( the key genes that only exists in one subtype)
LumA-specific key genes	LumB-specific key genes	Her2-specific key genes	Basal-like-specific key genes
RPL10	CDH1	NDUFA6	RPL23
RPL10A	LSM3	CCR8	ANAPC7
RPL34	PRPF4	CASP3	BUB3
RPL18A	FYN		SKP2
PRPF6	COX6C		RPL19
COX6B1	SF3A2		DDX5
RPL27A	PIK3R2		MAGOH
RPS13	CDK7		CCND2
RPL23A	HNRNPA1		PSMA1
RPL13	HSPA8		LSM2
RPL31	CLTC		POLD4
	RBM17		PLK1
	NRAS		DBF4
	PAK2		RBL1
	EGFR		DDB2
	LSM7		SF3A3
	PSMD12		CCNH

## Sheet: Table S9
Table S9: Enriched pathways shared by 4 subtypes( the intersection of pathways that was enriched in LumA,LumB,Her2 and Basal-like)
Cytokine-cytokine receptor interaction
Calcium signaling pathway
Olfactory transduction
Neuroactive ligand-receptor interaction pathway

## Sheet: Table S10
Table S10: Subtype-specific enriched pathways( the pathways that only enriched for one subtype)
LumA-specific pathways	LumB-specific pathways	Her2-specific pathways	Basal-like-specific pathways
Pathways in cancer			Axon guidance
			Chemokine signaling pathway
			Regulation of actin cytoskeleton
			Lysosome
			Leukocyte transendothelial migration
			Cell adhesion molecules (CAMs)
			MAPK signaling pathway
			Tight junction
			Endocytosis
